# Supplementary material
Source: Royal Society of Chemistry journal article supplement (doi:10.1039/d6em00129g)
Supplement: d6em00129g1.xlsx [file d6em00129g1.xlsx]

## Sheet: metadata
Data Tab	Parameter	Description
All	Soil Type	Young Transect (YT) or Old Transect (OT)
All	Condition	Defines supratidal, intertidal, or subtidal incubation conditions
All	Experiment Day	Day of the experiment that measurements were made
All	Soil Dry Mass (g)	Mass of dry soil in each mesocosm
All	Total Soil C (mmol)	Total soil C in each mesocosm
CO2 Flux	CO2 Flux (mmol/d)	CO2 flux measured at each sampling event
CO2 Flux	Incremental CO2 Release (mmol)	CO2-C released at each sampling event
CO2 Flux	Cumulative CO2 Release (mmol)	Cumulative CO2-C released throughout the experiment
Iron Extractions	Sampling Point	Initial or final
Iron Extractions	Extract Volume (L)	Volume of extractant solution used
Iron Extractions	Extract Soil Dry Mass (g)	Mass of dry soil used for soil extraction
Iron Extractions	Dithionite Extract Fe (mg/L)	Total Fe concentration in dithionite extract
Iron Extractions	Hydroxylamine Extract Fe (mg/L)	Total Fe concentration in hydroxylamine extract
Iron Extractions	Dithionite-soluble Fe (mg/g)	Total dithionite-soluble Fe in the soil (mg Fe/g dry soil)
Iron Extractions	Hydroxylamine-soluble Fe (mg/g)	Total hydroxylamine-soluble Fe in the soil (mg Fe/dry soil)
Solute Data	DOC (umol/L)	Dissolved organic C measured by TOC-L analyzer
Solute Data	Ca (umol/L)	Dissolved calcium measured by ICP-MS
Solute Data	Fe2+ (umol/L)	Dissolved ferrous iron measured by 1,10-phenanthroline method
Solute Data	Fe (umol/L)	Dissolved iron measured by ICP-MS
Solute Data	Mg (umol/L)	Dissolved magnesium by ICP-MS
Solute Data	P (umol/L)	Dissolved phosphorus measured by ICP-MS
Solute Data	ORP (mv vs SHE)	Oxidation-reduction potential measured by handheld probe
Solute Data	pH	Water pH measured by handheld probe
*Note: Averages and standard deviations represent data from triplicate reactors at sampling event.

## Sheet: CO2 Flux
Soil Type	Condition	Experiment Day	Soil Dry Mass (g)	Total Soil C (mmol)	Avg CO2 Flux (mmol/d)	Std Dev CO2 Flux (mmol/d)	Avg Incremental CO2 Release (mmol)	Std Dev Incremental CO2 Release (mmol)	Avg Cumulative CO2 Release (mmol)	Std Dev Cumulative CO2 Release (mmol)
OT	supratidal	0	104.587	327.416	0.0531406	0.00322912	0	0	0	0
OT	supratidal	6	104.587	327.416	0.0878001	0.0168849	0.422822	0.129982	0.422822	0.129982
OT	supratidal	12	104.587	327.416	0.0919286	0.0133283	0.539186	0.116676	0.962008	0.174667
OT	supratidal	21	104.587	327.416	0.138222	0.0135085	1.03568	0.116988	1.99769	0.210226
OT	supratidal	22	104.587	327.416	0.0130274	0.00892089	0.0756247	0.0954116	2.07331	0.230864
OT	supratidal	25	104.587	327.416	0.0146581	0.00103939	0.0415282	0.033451	2.11484	0.233275
OT	supratidal	30	104.587	327.416	0.0128237	0.0014562	0.0687044	0.0381743	2.18354	0.236378
YT	supratidal	0	130	215.206	0.0217086	0.0053546	0	0	0	0
YT	supratidal	6	130	215.206	0.0518742	0.0119565	0.220748	0.109477	0.220748	0.109477
YT	supratidal	12	130	215.206	0.055873	0.00740226	0.323242	0.0868632	0.54399	0.139751
YT	supratidal	21	130	215.206	0.05735	0.0144047	0.509504	0.120248	1.05349	0.184363
YT	supratidal	22	130	215.206	0.00624561	0.00468922	0.0317978	0.0699765	1.08529	0.197197
YT	supratidal	25	130	215.206	0.00740407	0.000738117	0.0204745	0.02757	1.10577	0.199115
YT	supratidal	30	130	215.206	0.00897577	0.00047632	0.0409496	0.0218372	1.14672	0.200309
OT	subtidal	0	95.9667	233.252	0.000195552	0.000224587	0	0	0	0
OT	subtidal	6	95.9667	233.252	0.0163584	0.00288147	0.049662	0.0536798	0.049662	0.0536798
OT	subtidal	12	95.9667	233.252	0.0222478	0.00385756	0.115819	0.0621761	0.165481	0.0821425
OT	subtidal	21	95.9667	233.252	0.0196354	0.00489162	0.188474	0.0700464	0.353955	0.107953
OT	subtidal	23	95.9667	233.252	0.0163583	0.00370216	0.0359937	0.0610417	0.389949	0.124016
OT	subtidal	25	95.9667	233.252	0.0191721	0.00491898	0.0355303	0.0702331	0.425479	0.142523
OT	subtidal	30	95.9667	233.252	0.0195417	0.00537134	0.0967845	0.0734543	0.522264	0.160338
YT	subtidal	0	129.267	195.336	0.000349375	0.000806015	0	0	0	0
YT	subtidal	6	129.267	195.336	0.0178878	0.00148497	0.0547116	0.0385438	0.0547116	0.0385438
YT	subtidal	12	129.267	195.336	0.0193283	0.00548257	0.111648	0.0740593	0.16636	0.0834889
YT	subtidal	21	129.267	195.336	0.0195755	0.0042326	0.175067	0.0652891	0.341427	0.105986
YT	subtidal	23	129.267	195.336	0.0197951	0.00476834	0.0393706	0.0691828	0.380798	0.126567
YT	subtidal	25	129.267	195.336	0.020709	0.00683205	0.040504	0.0827937	0.421302	0.151242
YT	subtidal	30	129.267	195.336	0.0214591	0.00231297	0.10542	0.0485762	0.526722	0.158851
OT	intertidal	0	60.73	246.125	0.13892	0.00862281	0	0	0	0
OT	intertidal	1	60.73	246.125	0.0614306	0.00266847	0.100175	0.052372	0.100175	0.052372
OT	intertidal	8	60.73	246.125	0.10948	0.00145179	0.598187	0.0381957	0.698362	0.0648208
OT	intertidal	11	60.73	246.125	0.0339318	0.0020517	0.215118	0.045319	0.913479	0.079092
OT	intertidal	15	60.73	246.125	0.134619	0.00282263	0.337102	0.053168	1.25058	0.0953016
OT	intertidal	17	60.73	246.125	0.033184	0.00471799	0.167803	0.0687456	1.41839	0.117509
OT	intertidal	25	60.73	246.125	0.0618296	0.00133225	0.380054	0.0368036	1.79844	0.123138
OT	intertidal	30	60.73	246.125	0.0403296	0.00147945	0.255398	0.0384867	2.05384	0.129012
YT	intertidal	0	110.76	188.6	0.0786866	0.00437769	0	0	0	0
YT	intertidal	1	110.76	188.6	0.00909189	0.00122304	0.0438892	0.0352449	0.0438892	0.0352449
YT	intertidal	8	110.76	188.6	0.0495526	0.00139794	0.205256	0.0374091	0.249145	0.0513969
YT	intertidal	11	110.76	188.6	0.016465	0.00348245	0.0990265	0.0590288	0.348171	0.078269
YT	intertidal	15	110.76	188.6	0.0646219	0.0029637	0.162174	0.0545511	0.510345	0.0954037
YT	intertidal	17	110.76	188.6	0.00973774	0.00541227	0.0743596	0.0736278	0.584705	0.120511
YT	intertidal	25	110.76	188.6	0.0218558	0.0010235	0.126374	0.0324468	0.711079	0.124803
YT	intertidal	30	110.76	188.6	0.0170248	0.00324919	0.0972017	0.0570108	0.808281	0.137208

## Sheet: Iron Extractions
Soil Type	Condition	Sampling Point	Replicate	Extract Volume (L)	Extract Soil Dry Mass (g)	Dithionite Extract Fe (mg/L)	Dithionite Extract Fe (mg/g)	Hydroxylamine Extract Fe (mg/L)	Hydroxylamine Extract Fe (mg/g)
YT	Supratidal	Initial	1	0.02	1.0711	542.967	10.1385	294.558	5.5001
YT	Supratidal	Initial	2	0.02	1.0711	549.62	10.2627	285.848	5.33747
YT	Supratidal	Initial	3	0.02	1.0711	536.313	10.0142	282.536	5.27562
YT	Supratidal	Final	1	0.02	1.1814	472.171	7.99342	223.5	3.78364
YT	Supratidal	Final	2	0.02	1.1305	438.214	7.75256	208.102	3.68159
YT	Supratidal	Final	3	0.02	1.2085	410.17	6.78808	293.231	4.85281
YT	Intertidal	Initial	1	0.02	1.331	379.83	5.70745	318.151	4.78063
YT	Intertidal	Initial	2	0.02	1.331	308.296	4.63255	306.67	4.60812
YT	Intertidal	Initial	3	0.02	1.331	336.69	5.0592	317.889	4.7767
YT	Intertidal	Final	1	0.02	1.1645	483.864	8.31024	310.199	5.3276
YT	Intertidal	Final	2	0.02	1.1645	464.701	7.98112	302.085	5.18824
YT	Intertidal	Final	3	0.02	1.1645	437.776	7.51869	296.887	5.09895
YT	Subtidal	Initial	1	0.02	0.993	237.812	4.78978	167.026	3.36408
YT	Subtidal	Initial	2	0.02	0.993	223.649	4.50452	160.456	3.23174
YT	Subtidal	Initial	3	0.02	0.993	209.963	4.22887	163.804	3.29918
YT	Subtidal	Final	1	0.02	1.2281	231.198	3.76513	216.631	3.52791
YT	Subtidal	Final	2	0.02	1.2281	226.626	3.69068	212.154	3.455
YT	Subtidal	Final	3	0.02	1.2281	187.717	3.05703	209.465	3.4112
OT	Supratidal	Initial	1	0.02	0.883	680.792	15.42	354.28	8.02447
OT	Supratidal	Initial	2	0.02	0.883	671.97	15.2201	320.344	7.25581
OT	Supratidal	Initial	3	0.02	0.883	736.199	16.6749	350.444	7.93759
OT	Supratidal	Final	1	0.02	0.7282	390.258	10.7184	249.611	6.85555
OT	Supratidal	Final	2	0.02	0.9402	438.214	9.32171	248.392	5.28381
OT	Supratidal	Final	3	0.02	0.9929	515.613	10.386	245.486	4.94483
OT	Intertidal	Initial	1	0.02	1.0601	346.602	6.53905	293.058	5.52887
OT	Intertidal	Initial	2	0.02	1.0601	304.483	5.74442	309.286	5.83503
OT	Intertidal	Initial	3	0.02	1.0601	285.029	5.37739	298.706	5.63542
OT	Intertidal	Final	1	0.02	1.2439	613.645	9.86647	458.084	7.36528
OT	Intertidal	Final	2	0.02	1.2439	589.833	9.4836	439.374	7.06445
OT	Intertidal	Final	3	0.02	1.2439	528.755	8.50157	443.751	7.13483
OT	Subtidal	Initial	1	0.02	1.0279	247.724	4.82001	202.948	3.94879
OT	Subtidal	Initial	2	0.02	1.0279	240.429	4.67806	200.692	3.90489
OT	Subtidal	Initial	3	0.02	1.0279	223.542	4.3495	194.211	3.7788
OT	Subtidal	Final	1	0.02	1.2483	253.026	4.05393	229.953	3.68426
OT	Subtidal	Final	2	0.02	1.2483	243.493	3.9012	222.94	3.5719
OT	Subtidal	Final	3	0.02	1.2483	225.731	3.61662	218.003	3.4928

## Sheet: Solute Data
Soil Type	Condition	Soil Dry Mass (g)	Total Soil C (mmol)	Experiment Day	Avg DOC (umol/L)	Std Dev DOC (umol/L)	Avg Ca (umol/L)	Std Dev Ca (umol/L)	Avg Fe2+ (umol/L)	Std Dev Fe2+ (umol/L)	Avg Fe (umol/L)	Std Dev Fe (umol/L)	Avg Mg (umol/L)	Std Dev Mg (umol/L)	Avg P (umol/L)	Std Dev P (umol/L)	Avg ORP (mv vs SHE)	Std Dev ORP (mv vs SHE)	Avg pH	Std Dev pH
YT	intertidal	110.76	188.6	0	8318.64	2053.8	705.443	307.23	543.17	225.805	931.911	22.7694	8221.29	471.083	113.751	1.31804	67.75	1.25	6.89093	0.112403
YT	intertidal	110.76	188.6	1	11750.1	1089.87	7941.56	2012.37	586.962	43.8623	974.69	277.842	5974.98	2210.82	124.298	14.9731	60.3333	3.60555	7.02133	0.0591627
YT	intertidal	110.76	188.6	8	4619.83	2095.56	4575.74	3351.49	289.492	84.9652	387.765	291.675	2592.67	1911.07	66.1845	14.4584	69.8333	4.87055	7.29333	0.122698
YT	intertidal	110.76	188.6	11	5703.54	1477.72	3939.88	1866.01	450.652	118.904	517.885	230.189	2195.7	1044.39	107.617	17.436	63.8333	6.05989	7.43733	0.143992
YT	intertidal	110.76	188.6	15	1747.29	1256.69	2646.25	1101.05	81.1771	78.7364	82.1216	105.324	1478.45	578.679	38.1704	8.32301	72.8333	5.19503	7.34367	0.297568
YT	intertidal	110.76	188.6	16	2496.83	1442.15	2246.26	1521.78	81.1771	78.7364	124.5	112.468	1176.78	826.832	44.3813	10.6075	65.8333	5.75507	7.58933	0.0808139
YT	intertidal	110.76	188.6	17	2903.11	347.243	1574.66	1236.48	125.048	99.2499	182.447	70.1951	798.359	663.94	60.1601	9.42247	60	5.55936	7.64867	0.113846
YT	intertidal	110.76	188.6	25	747.332	236.709	1688.53	452.178	26.8601	4.38623	117.035	89.6132	722.768	396.662	22.6552	8.29279	60.3333	5.32065	7.38	0.22366
YT	intertidal	110.76	188.6	30	803.622	0	1460.57	155.332	69.8362	8.77246	122.327	10.7829	760.057	93.2946	23.2136	0	54.5	8.37655	7.652	0.0664168
OT	intertidal	60.73	246.13	0	10094.7	1622.5	7858.65	242.711	1130.36	178.386	1817.88	17.9878	4703.57	372.155	132.377	1.04125	61.5	0.9875	6.375	0.0887983
OT	intertidal	60.73	246.13	1	10192.9	1198.85	5977.52	2213.6	1222.13	48.2485	2227.48	305.626	3548.89	2431.9	151.256	16.4704	58	3.96611	6.407	0.0650789
OT	intertidal	60.73	246.13	8	4121.13	1655.5	4078.57	2647.68	810.278	67.1225	1060.67	230.423	2426.13	1509.75	59.8783	11.4221	52.25	3.84773	7.0005	0.0969317
OT	intertidal	60.73	246.13	11	7560.86	1167.4	3701.08	1474.14	837.139	130.934	1275.79	181.849	2177.78	825.069	83.1836	13.7744	51.75	4.78731	7.201	0.113753
OT	intertidal	60.73	246.13	15	2055.28	1193.86	5832.62	1045.99	232.787	74.7995	110.018	100.058	2255.99	549.745	1.245	7.90686	57.75	4.93528	7.2055	0.28269
OT	intertidal	60.73	246.13	16	4372.59	1139.3	1474.6	1202.21	232.787	62.2017	197.263	88.85	794.849	653.198	10.1255	8.37995	54.5	4.54651	7.353	0.063843
OT	intertidal	60.73	246.13	17	6460.2	274.322	1200.27	976.818	389.471	78.4074	282.671	55.4541	641.241	524.513	56.0128	7.44375	45.25	4.39189	7.407	0.0899383
OT	intertidal	60.73	246.13	25	686.888	118.355	797.904	226.089	22.0252	2.19311	190.188	44.8066	396.601	198.331	0	4.14639	61.75	2.66032	7.125	0.11183
OT	intertidal	60.73	246.13	30	934.965	0	529.634	122.712	86.3999	6.93024	203.771	8.51848	249.111	73.7027	0	0	55	6.61748	7.3415	0.0844692
OT	subtidal	95.97	233.25	0	0	0	0	0	0	0	0	0	0	0	0	0	71	0	6.9	0.14
OT	subtidal	95.97	233.25	3	12653.1	1123.1	2054.33	45	410	15	432	21	7771.72	460.152	171	13	64	3	7.01	0.09
OT	subtidal	95.97	233.25	8	13869.8	1279.72	8339.6	751	1208	20	1137	29	4464.27	1864.02	647	9	55	3	7.05	0.05
OT	subtidal	95.97	233.25	11	13890.8	905.572	6857.96	147	653	33	921	19	3254.66	248.578	509	8	54	7	7.1	0.01
OT	subtidal	95.97	233.25	16	13292.2	352.977	11268.6	194	1048	20	1683	23	5788.93	821.351	749	24	72	8	7.02	0.17
OT	subtidal	95.97	233.25	19	11729	448.479	9162.91	180	818	20	1913	24	4912.83	845.983	603	6	77	6	7.13	0.13
OT	subtidal	95.97	233.25	23	11926.4	31.367	15882.7	31	1221	8	1861	9	8637.39	388.809	634	7	86	3	7.2	0.1
OT	subtidal	95.97	233.25	26	11505.7	29.4942	No data	No data	No data	4	2148	No data	No data	0	No data	0	89	5	7.28	0.02
OT	subtidal	95.97	233.25	30	9762.5	184.956	11596.1	217	1465	No data	2250	12	5773.09	2781.35	623	26	88	3	7.26	0.04
YT	subtidal	129.27	195.34	0	0	0	0	0	0	0	0	0	0	0	0	0	83	2	6.78	0.13
YT	subtidal	129.27	195.34	3	12228.1	719.859	1884.13	7	765.931	43	803	24	7506.51	157	205	7	79	1	6.982	0.09
YT	subtidal	129.27	195.34	8	11756.9	245.024	5267.29	139	1066.12	7	1191	19	2555.03	69	251	8	79	1	7.02	0.05
YT	subtidal	129.27	195.34	11	11414.6	187.661	7355.33	10	1089.9	23	1383	34	3277.63	2	298	1	58	1	7.06	0.01
YT	subtidal	129.27	195.34	16	10122.9	473.024	8794.5	320	879.347	29	1572	82	4137.52	143	396	24	60	4	7.14	0.16
YT	subtidal	129.27	195.34	19	10454.8	201.839	12459.2	248	1548.21	52	2178	44	6020	107	486	11	72	7	7.14	0.13
YT	subtidal	129.27	195.34	23	8862.39	189.177	8237.91	24	1078.47	65	No data	6	4324.77	9	393	3	66	8	7.08	0.1
YT	subtidal	129.27	195.34	26	8201.56	58.5485	No data	0	679.895	4	No data	0	No data	0	371	0	76	5	7.11	0.02
YT	subtidal	129.27	195.34	30	9402.78	43.866	12469.4	121	1007.25	18	2363	32	5880.99	62	491	23	81	7	7.13	0.03
